# Supplementary material
Source: Research Square preprint supplement (doi:10.21203/rs.3.rs-9278821/v1)
Supplement: Supplementary file 1 [file 77cf0cdefeb7d527fe9cb69e.xlsx]

## Sheet: TableS1
	Table S1. Cultivar information and phenological traits in the 2022 and 2024 field experiments.
	Cultivar	Abbreviation	Genome type	2022									2024
				Sowing	Transplanting	5 days after heading		Days to 5DAH		Cumulative solar			Sowing	Transplanting	Full-heading		Days to full-heading		Cumulative solar
				date	date	for main stem (5DAH)				radiation to 5DAH			date	date	date (FH)				radiation to FH
								(d)		(MJ m-2 d-1)							(d)		(MJ m-2 d-1)
	Milyang 23	M23	IND	2022-05-06	2022-05-31	2022-08-24	d	85	d	1464.39	c		2025-05-15	2025-06-11	2024-08-31	a	81	de	1466.48	e
	Takanari	TN	IND	2022-05-06	2022-05-31	2022-08-24 18:00:00	d	85.75	d	1467.61	c		2025-05-17	2025-06-13	2024-08-27 06:00:00	bc	75.25	f	1371.63	f
	Akenohoshi	AH	TEJ	2022-05-06	2022-05-31	2022-09-02 12:00:00	b	94.5	b	1577.76	b		2025-05-07	2025-06-03	2024-08-31	a	89	c	1625.24	c
	Nanjing 11	N11	IND	2022-05-06	2022-05-31	2022-08-13	e	74	e	1305.91	d		2025-05-25	2025-06-21	2024-08-26	c	66	g	1205.29	g
	Yumeaoba	YA	TEJ	2022-05-06	2022-05-31	2022-08-13 12:00:00	e	74.5	e	1313.81	d		2025-05-27	2025-06-23	2024-08-31	a	69	g	1234.07	g
	Momiroman	MR	MIX	2022-05-06	2022-05-31	2022-08-31 12:00:00	bc	92.5	bc	1559.99	b		2025-05-07	2025-06-03	2024-08-31	a	89	c	1625.24	c
	Teqing	TQ	IND	2022-05-06	2022-05-31	2022-08-27	cd	88	cd	1497.02	bc		2025-05-12	2025-06-08	2024-08-26 18:00:00	c	79.75	e	1474.38	e
	Hokuriku 193	H193	IND	2022-05-06	2022-05-31	2022-09-10 06:00:00	a	102.25	a	1681.96	a		2025-05-01	2025-05-28	2024-08-30	ab	94	b	1711.38	b
	Hoshiaoba	HA	MIX	2022-05-06	2022-05-31	2022-08-28 06:00:00	bcd	89.25	bcd	1511.55	bc		2025-05-12	2025-06-08	2024-08-31	a	84	d	1527.07	d
	Kusanohoshi	KH	MIX	2022-05-06	2022-05-31	2022-09-12	a	104	a	1712.43	a		2025-04-28	2025-05-25	2024-09-02	a	100	a	1803.53	a
	F value			-	-	55.5999	***	202.545	***	59.0523	***		-	-	11.8941	***	259.62	***	630.011	***
	Cultivars were classified into indica (IND), temperate japonica (TEJ), or japonica–indica admixture (MIX) based on population structure analysis reported by Yonemaru et al. (2014).
	Values indicate means (n = 4). Different letters within each column indicate significant differences among cultivars (Tukey’s HSD, P < 0.05). F values and significant levels are from one-way ANOVA. Significance levels: *** P < 0.001.

## Sheet: TableS2
	Table S2. NSC-related traits across cultivars in 2022 and 2024 field experiments.
		2022																																							2024
	Cultivar	NSC (mg stem-1)													RC (mg stem-1)													NSC/RC													NSC (g plant-1)		RC (g plant-1)		NSC/RC
		IN1		IN2		IN3		IN4		IN5+		Culm			IN1		IN2		IN3		IN4		IN5+		Culm			IN1		IN2		IN3		IN4		IN5+		Culm
	M23	49.5939	b	75.598	d	60.239	c	29.8275	b	13.8412	d	229.1	c		281.781	b	295.952	bcd	172.636	e	104.348	d	44.35	d	899.067	b		0.175317	b	0.256533	d	0.344479	c	0.280157	de	0.296734	bc	0.253034	b		0.964308	e	7.63339	de	0.125237	e
	TN	41.7766	b	80.9491	cd	78.7116	c	26.4487	b	14.6882	d	242.574	c		256.486	b	324.213	abc	244.251	bcde	127.601	cd	83.4216	cd	1035.97	b		0.161803	b	0.250723	d	0.31135	c	0.19728	de	0.217615	c	0.234624	b		1.00634	e	6.68386	e	0.15366	de
	AH	50.5463	b	80.3262	cd	67.9397	c	32.5756	b	14.932	d	246.32	c		280.604	b	238.149	d	222.11	cde	187.774	cd	155.425	bcd	1084.06	b		0.180515	b	0.33713	cd	0.304491	c	0.16552	e	0.098811	c	0.226564	b		1.46232	de	7.96538	de	0.184162	cde
	N11	32.0446	b	79.5505	cd	80.8767	c	69.6862	b	44.4541	d	306.612	c		256.305	b	289.224	bcd	197.123	de	146.889	cd	81.05	cd	970.592	b		0.128106	b	0.276516	d	0.411895	bc	0.475618	ab	0.538927	a	0.317294	b		1.97253	d	7.50007	de	0.261766	c
	YA	52.3407	ab	112.839	bcd	94.5602	bc	53.3168	b	36.9297	d	349.987	c		301.484	b	280.286	bcd	234.09	bcde	161.583	cd	97.95	bcd	1075.39	b		0.171094	b	0.403465	bc	0.401398	bc	0.328768	cd	0.286964	bc	0.32486	b		2.26146	cd	8.24374	cde	0.283077	bc
	MR	66.6815	ab	137.34	b	96.511	bc	60.1835	b	65.2803	cd	425.997	c		429.774	a	391.38	a	267.049	abcde	207.978	bc	232.8	bc	1528.98	a		0.155335	b	0.351187	cd	0.361698	c	0.289947	de	0.284418	bc	0.280238	b		1.61697	de	8.47573	cde	0.190517	cde
	TQ	45.489	b	125.462	bc	199.443	a	185.696	a	147.395	bc	703.485	b		259.461	b	310.613	bcd	358.732	a	306.204	a	252.5	b	1487.51	a		0.17522	b	0.396333	bc	0.549061	ab	0.59278	a	0.571069	a	0.463935	a		3.54212	b	9.12428	cd	0.38858	a
	H193	44.7632	b	117.235	bcd	163.001	ab	136.077	a	246.349	a	707.426	b		226.112	b	263.59	cd	293.924	abc	305.523	a	545.45	a	1634.6	a		0.198744	ab	0.445693	bc	0.550891	ab	0.44387	bc	0.45242	ab	0.431873	a		3.12924	bc	12.7772	a	0.244966	cd
	HA	64.1345	ab	138.248	b	154.68	ab	172.88	a	243.506	ab	773.449	ab		246.915	b	275.202	cd	290.52	abcd	329.045	a	523.525	a	1665.21	a		0.260275	ab	0.502188	ab	0.531835	ab	0.525462	ab	0.463245	ab	0.464043	a		4.58078	a	12.3531	ab	0.372686	ab
	KH	101.011	a	203.524	a	185.459	a	156.357	a	301.745	a	948.096	a		275.789	b	356.951	ab	328.191	ab	294.043	ab	587.7	a	1842.67	a		0.374938	a	0.572969	a	0.563518	a	0.530645	ab	0.511537	a	0.515077	a		2.31207	cd	10.3406	bc	0.222344	cde
	F value	3.54581	**	16.1001	***	13.1291	***	23.4108	***	31.2884	***	30.473	***		8.17545	***	7.52448	***	8.70734	***	19.5411	***	37.6964	***	20.2033	***		3.58784	**	20.2786	***	11.3605	***	27.9594	***	11.8002	***	26.6827	***		35.5114	***	19.7361	***	18.0547	***
	Values indicate means (n = 4). Different letters within each column indicate significant differences among cultivars (Tukey’s HSD, P < 0.05). F values and significant levels are from one-way ANOVA. Significance levels: ** P < 0.01, *** P < 0.001.

## Sheet: TableS3
	Table S3. Morphological traits of individual internodes and culm across cultivars in the 2022 field experiment.
	Cultivar	Volume (mm3)													Length (mm)													Cross-sectional area (mm2)											Diameter (mm)
		IN1		IN2		IN3		IN4		IN5+		Culm			IN1		IN2		IN3		IN4		IN5+		Culm			IN1		IN2		IN3		IN4		IN5+			IN1		IN2		IN3		IN4		IN5+
	M23	1279.41	ab	2071.06	ab	953.952	b	466.975	d	180.827	c	4952.22	c		401	ab	214.25	bc	78.25	d	33	d	11.75	c	738.25	d		3.1925		9.65	ab	12.295	a	14.275	ab	15.6675			3.455	a	5.74	ab	5.7025	ab	5.755	b	5.1825	d
	TN	1141.98	b	2190.55	a	1389.75	b	564.282	d	330.095	c	5616.66	c		364	bcde	218.25	bc	112.5	bcd	36	d	15.165	c	745.915	d		3.14675		10.0435	a	12.3365	a	14.5025	ab	14.3375			3.50434	a	6.05525	a	5.9049	a	5.77734	b	5.95	bcd
	AH	1232.63	ab	1332.64	d	1123.65	b	980.043	bcd	565.732	c	5234.7	c		396.25	abc	198.5	bc	148.75	abc	92.25	bc	29	bc	864.75	bc		3.11		6.7025	d	7.625	e	11.1175	bc	19.8875			2.7775	bcd	4.055	f	4.295	e	4.855	cd	5.685	cd
	N11	1064.06	b	1714.62	bcd	1021.86	b	627.913	d	353.415	c	4781.86	c		366	bcde	210	bc	90	d	46.25	d	19.5	bc	731.75	d		2.8975		8.17	abcd	11.4025	ab	13.7325	ab	13.93			3.17	abc	5.305	bc	5.7175	a	6.085	ab	6.18	abcd
	YA	1129.98	b	1569.38	cd	1080.96	b	689.872	cd	370.752	c	4840.95	c		388.25	abcd	198.25	bc	105	cd	55.25	cd	26	bc	772.75	cd		2.9075		7.9125	bcd	10.2925	bc	12.6225	abc	16.7925			2.62	d	4.605	def	5.0625	c	5.3675	bcd	5.6525	cd
	MR	1473.97	a	2005.89	abc	1047.11	b	777.312	cd	634.158	bc	5938.44	bc		423.25	a	251	a	114.25	bcd	65.75	cd	40.5	bc	894.75	ab		3.475		8	bcd	9.2625	cd	12.0725	abc	15.8875			3.1875	abc	5.06	cd	5.1475	c	5.5325	bcd	5.82	bcd
	TQ	1173.94	ab	2021.94	abc	2236.24	a	1806.69	a	1275.1	b	8513.91	a		343.5	cde	225.25	ab	194.75	a	120.75	ab	60.75	b	945	ab		3.44		9.025	abc	11.4975	ab	14.9125	a	21.1675			3.255	ab	5.345	bc	5.9475	a	6.585	a	7.1775	a
	H193	1095.17	b	1520.32	d	1493.09	b	1513.83	ab	2208.61	a	7831.02	a		334.75	de	191.25	c	160.5	abc	130	ab	119.25	a	935.75	ab		3.245		7.9525	bcd	9.3175	cd	11.695	abc	18.575			3.07	abcd	4.7825	cde	5.0225	cd	5.625	bc	6.575	abc
	HA	1078.62	b	1531.68	d	1369.29	b	1822.16	a	2307.84	a	8109.59	a		350.75	bcde	211	bc	148.25	abc	143.5	a	120	a	973.5	a		3.075		7.2625	cd	9.2775	cd	12.7175	abc	19.2625			2.61	d	4.71	de	5.1925	bc	5.8475	ab	6.735	ab
	KH	1042.76	b	1360.41	d	1300.44	b	1282.08	abc	2197.43	a	7183.12	ab		316.25	e	206.25	bc	166.75	ab	130.5	ab	151.5	a	971.25	a		3.3025		6.58	d	7.82	de	9.7825	c	14.6925			2.735	cd	4.2375	ef	4.53	de	4.82	d	5.715	cd
	F value	3.63545	**	10.5694	***	9.23274	***	16.5703	***	35.66	***	20.7922	***		8.37906	***	8.11876	***	10.5021	***	21.7107	***	34.2568	***	21.31	***		1.73195	n.s.	7.54404	***	26.5511	***	4.67103	***	1.10057	n.s.		11.0349	***	28.6693	***	28.2074	***	10.3321	***	9.791	***
	Values indicate means (n = 4). Different letters within each column indicate significant differences among cultivars (Tukey’s HSD, P < 0.05). F values and significant levels are from one-way ANOVA. Significance levels: ** P < 0.01, *** P < 0.001; n.s. not significant.
[truncated: 10 more columns]

## Sheet: TableS4
	Table S4. Morphological traits of individual internodes and culm across cultivars in the 2024 field experiment.
	Cultivar	Volume (mm3)													Length (mm)													Cross-sectional area (mm2)											Diameter (mm)
		IN1		IN2		IN3		IN4		IN5+		Culm			IN1		IN2		IN3		IN4		IN5+		Culm			IN1		IN2		IN3		IN4		IN5+			IN1		IN2		IN3		IN4		IN5+
	M23	1456.69	a	2097.41	ab	840.095	d	506.776	c	388.728	d	5289.7	c		363.75	ab	191.25	b	62.25	e	29.5	f	20.25	e	667	f		4.00825	a	10.9977	a	13.642	a	17.3822	a	19.4553	abc		3.96343	a	5.9881	a	6.24402	a	6.67414	a	5.93935	bcd
	TN	1214.58	abc	2349.46	a	1103.17	bcd	526.706	bc	461.094	d	5655.02	bc		319	bc	218.25	b	91.25	de	35	f	23.5	de	687	ef		3.80425	ab	10.8842	a	12.2583	ab	15.3765	ab	19.708	ab		3.91084	a	6.44256	a	6.11947	a	6.28487	ab	6.38861	abcd
	AH	1224.52	ab	1247.74	e	955.869	d	758.242	bc	486.349	d	4672.73	c		419.25	a	210.5	b	121.75	cd	71	cde	24.75	de	847.25	bcd		2.90925	cde	5.92475	c	7.8655	c	10.6728	cd	19.4503	abc		2.76616	cd	3.96366	e	4.31906	e	4.80881	e	5.69302	d
	N11	816.809	cd	1349.68	e	1089.09	cd	718.005	bc	441.291	d	4414.87	c		348.75	bc	215.25	b	126.25	bcd	57.25	def	26.5	de	774	def		2.33925	e	6.2405	c	8.738	c	12.966	bcd	17.0365	abc		3.04515	bc	4.67479	bcd	5.35314	bc	6.11881	abc	6.02491	bcd
	YA	874.271	bcd	1273.45	e	1011.05	cd	860.254	b	813.58	cd	4832.61	c		330	bc	202.5	b	128.5	bcd	82.75	cd	52.75	cd	796.5	cde		2.649	cde	6.25525	c	7.901	c	10.4422	cd	15.5331	c		2.57739	d	4.17951	de	4.51807	de	5.15398	de	5.87603	cd
	MR	1241.4	ab	1935.59	abc	1162.27	bcd	529.154	bc	736.919	cd	5605.33	bc		365.5	ab	283.75	a	142.25	abc	47.75	ef	42.75	cde	882	bcd		3.3865	abc	6.82325	bc	8.19425	c	11.083	cd	17.2487	abc		3.23656	b	4.96516	bc	5.00105	cde	5.4823	cde	5.80995	cd
	TQ	1059.64	abcd	1527.91	cde	1842.54	a	1254.62	a	1198.97	c	6883.67	ab		359.5	abc	208.75	b	185.5	a	95.25	bc	58.25	c	907.25	abc		2.93525	cde	7.312	bc	9.9325	bc	13.2212	bc	20.7353	a		3.20876	b	5.01235	bc	5.69675	ab	6.43982	ab	6.96518	a
	H193	1031.31	bcd	1853.68	bcd	1588.36	ab	1305.52	a	2134.91	ab	7913.77	a		325.5	bc	223.25	b	171.75	ab	117.75	ab	117	b	955.25	ab		3.16225	bcd	8.2945	b	9.26675	c	11.079	cd	18.2508	abc		3.02116	bc	5.10619	b	5.0392	bcd	5.49319	cde	6.5063	abc
	HA	783.446	d	1196.59	e	1482.61	abc	1522.9	a	1750.21	b	6735.76	ab		300.75	c	192.25	b	169.75	abc	119.5	ab	89.5	b	871.75	bcd		2.59301	de	6.20993	c	8.75043	c	12.8442	bcd	19.8118	ab		2.90927	bcd	4.50889	cd	5.0581	bcd	5.88159	bcd	6.71769	ab
	KH	1157.6	abcd	1446.65	de	1303.77	bcd	1254.77	a	2490.89	a	7653.69	a		342	bc	219.25	b	168.25	abc	132.5	a	152.75	a	1014.75	a		3.34675	abc	6.5665	bc	7.79025	c	9.50525	d	16.2794	bc		2.96504	bcd	4.50817	cd	4.60834	de	4.96252	e	6.17892	abcd
	F value	6.71785	***	18.0811	***	9.21947	***	29.0429	***	50.0915	***	18.9783	***		6.97584	***	11.0411	***	14.8043	***	37.4011	***	52.8144	***	20.9157	***		12.0242	***	22.4959	***	14.1631	***	11.1559	***	4.11191	**		30.7816	***	47.4446	***	20.9322	***	15.9696	***	6.42926	***
	Values indicate means (n = 4). Different letters within each column indicate significant differences among cultivars (Tukey’s HSD, P < 0.05). F values and significant levels are from one-way ANOVA. Significance levels: ** P < 0.01, *** P < 0.001.
[truncated: 10 more columns]

## Sheet: TableS5
	Table S5. NSC-related traits of individual internodes and culm across treatments in the plant growth regulator experiment.
	Treatment	NSC (mg stem-1)																	RC (mg stem-1)																	NSC/RC
		IN1		IN2		IN3		IN4		IN5+		Upper INs		Lower Ins		Culm			IN1		IN2		IN3		IN4		IN5+		Upper INs		Lower Ins		Culm			IN1		IN2		IN3		IN4		IN5+		Upper INs		Lower Ins
	MM	19.066		54.6581		68.9811		89.7895		117.755		73.7241		276.525		350.249			132.254		174.362		196.299		212.35		198.685		306.616		607.335		913.951			0.142275		0.314534		0.351519		0.413462		0.592442		0.238747		0.456351
	UM	17.1329	n.s.	57.8409	n.s.	54.2919	n.s.	87.5265	n.s.	49.1187	**	74.9737	n.s.	190.937	**	265.911	**		132.167	n.s.	187.799	n.s.	170.508	n.s.	195.673	n.s.	89.4613	n.s.	319.966	n.s.	455.643	**	775.609	*		0.128797	n.s.	0.305806	n.s.	0.312486	n.s.	0.454185	n.s.	0.514361	n.s.	0.232708	n.s.	0.419752	n.s.
	GM	36.0413	***	95.9656	***	99.8875	*	122.955	n.s.	38.4128	***	132.007	***	261.256	n.s.	393.263	n.s.		168.059	**	221.804	*	259.092	**	357.625	***	188.847	n.s.	389.863	**	805.564	***	1195.43	***		0.215212	**	0.429653	**	0.393211	n.s.	0.344638	n.s.	0.200042	***	0.336885	***	0.323817	***
	MU	16.8031	n.s.	50.7875	n.s.	82.4024	n.s.	95.0041	n.s.	130.925	n.s.	67.5906	n.s.	308.332	n.s.	375.922	n.s.		120.297	n.s.	141.333	n.s.	202.938	n.s.	233.036	n.s.	225.075	n.s.	261.629	n.s.	661.048	n.s.	922.678	n.s.		0.140665	n.s.	0.358616	n.s.	0.406547	n.s.	0.407604	n.s.	0.572169	n.s.	0.258355	n.s.	0.466219	n.s.
	MG	25.5724	n.s.	47.4939	n.s.	51.671	n.s.	83.5975	n.s.	98.4131	n.s.	73.0662	n.s.	233.681	n.s.	306.748	n.s.		155.648	†	256.186	***	198.329	n.s.	216.503	n.s.	198.667	n.s.	411.834	***	613.499	n.s.	1025.33	†		0.163963	n.s.	0.184051	***	0.25902	†	0.381738	n.s.	0.502912	n.s.	0.176685	*	0.380046	†
	UG	21.8252	n.s.	53.5581	n.s.	46.0393	n.s.	77.1217	n.s.	64.6261	*	75.3833	n.s.	187.787	**	263.17	**		132.895	n.s.	262.762	***	183.821	n.s.	184.178	n.s.	128.434	n.s.	395.657	**	496.433	*	892.09	n.s.		0.166065	n.s.	0.204519	**	0.249661	*	0.422278	n.s.	0.500459	n.s.	0.191182	n.s.	0.37922	†
	GU	29.3033	*	69.3246	n.s.	98.9372	*	151.325	**	90.1835	n.s.	98.6279	n.s.	340.445	*	439.073	**		135.957	n.s.	162.515	n.s.	218.103	n.s.	365.615	***	341.056	*	298.472	n.s.	924.775	***	1223.25	***		0.215115	**	0.424218	**	0.452646	*	0.419855	n.s.	0.266139	***	0.329118	**	0.368269	*
	F value	10.5605	***	8.4302	***	10.5139	***	5.92371	***	7.46996	***	9.34335	***	12.018	***	16.1797	***		6.84903	***	21.0791	***	6.07349	***	19.574	***	5.73728	***	15.2067	***	36.1966	***	27.9514	***		6.80797	***	25.8518	***	9.11269	***	0.830221	n.s.	22.4863	***	16.9787		5.5465	***
	Values indicate means (n = 5). Symbols indicate significant differences from the control (MM) (Dunnett’s test). F values and significant levels are from one-way ANOVA. Significance levels: † P < 0.10, * P < 0.05, ** P < 0.01, *** P < 0.001; n.s. not significant.
[truncated: 2 more columns]

## Sheet: TableS6
	Table S6. Morphological traits of individual internodes and culm across treatment in the plant growth regulator experiment.
	Treatment	Volume (mm3)													Length (mm)													Cross-sectional area (mm2)											Diameter (mm)
		IN1		IN2		IN3		IN4		IN5+		Culm			IN1		IN2		IN3		IN4		IN5+		Culm			IN1		IN2		IN3		IN4		IN5+			IN1		IN2		IN3		IN4		IN5+
	MM	692.283		1204.99		1019.68		815.784		695.713		4428.45			315.4		205.4		124.4		81.2		53.8		780.2			2.1898		5.9146		8.2434		10.0328		13.1379			2.43386		4.04151		4.56176		5.08561		5.18496
	UM	740.778	n.s.	1253.84	n.s.	839.943	n.s.	752.242	n.s.	281.594	n.s.	3868.39	n.s.		325	n.s.	212	n.s.	95.8	n.s.	71.4	n.s.	20	n.s.	724.2	n.s.		2.284	n.s.	5.9324	n.s.	8.7618	n.s.	10.5622	n.s.	14.8268	n.s.		2.50752	n.s.	4.0855	n.s.	4.73521	n.s.	4.96508	n.s.	5.21166	n.s.
	GM	869.39	*	1253.14	n.s.	1017.48	n.s.	1868.4	***	801.863	n.s.	5810.28	***		352.9	*	187.9	n.s.	128.2	n.s.	155.9	***	56.6	n.s.	881.5	**		2.46299	n.s.	6.66736	n.s.	7.9399	n.s.	12.0277	*	14.2497	n.s.		2.68167	*	4.3329	†	4.74115	n.s.	5.64422	*	5.49097	n.s.
	MU	687.141	n.s.	767.003	***	1139.56	n.s.	922.76	n.s.	816.836	n.s.	4333.3	n.s.		266.8	**	135.2	***	125.8	n.s.	82.6	n.s.	57.6	n.s.	668	***		2.5754	*	5.6774	n.s.	9.0882	n.s.	11.1858	n.s.	14.3723	n.s.		2.637	*	3.98413	n.s.	4.79277	n.s.	5.36206	n.s.	5.4787	n.s.
	MG	831.69	†	1772.52	***	1049.22	n.s.	916.816	n.s.	718.551	n.s.	5288.8	*		337.4	n.s.	281.6	***	113.8	n.s.	79.6	n.s.	49	n.s.	861.4	*		2.4664	n.s.	6.298	n.s.	9.175	n.s.	11.5352	n.s.	14.7522	n.s.		2.71877	**	4.39219	*	4.87978	n.s.	5.5218	†	5.56593	n.s.
	UG	716.998	n.s.	1848.96	***	1076.72	n.s.	707.675	n.s.	452.982	n.s.	4803.34	n.s.		316.2	n.s.	311	***	117.2	n.s.	61	n.s.	27.6	n.s.	833	n.s.		2.2474	n.s.	5.9466	n.s.	9.2324	n.s.	11.626	n.s.	16.3414	**		2.48808	n.s.	4.20099	n.s.	4.8192	n.s.	5.34736	n.s.	5.64346	*
	GU	740.813	n.s.	890.829	**	1005.52	n.s.	1989.26	***	1155.77	n.s.	5782.19	***		302.8	n.s.	144.4	***	136.2	n.s.	173.2	***	81.8	n.s.	838.4	n.s.		2.442	n.s.	6.1824	n.s.	7.413	n.s.	11.445	n.s.	14.3045	n.s.		2.62034	†	4.09661	n.s.	4.56022	n.s.	5.52101	†	5.53579	n.s.
	F value	3.46493	*	55.6329	***	1.09301	n.s.	32.7026	***	4.24142	**	16.983	***		9.22849	***	94.1127	***	1.88076	n.s.	37.7264	***	4.22368	**	19.2771	***		2.98645	*	1.71868	n.s.	3.71736	**	2.0677	n.s.	2.19822	n.s.		4.25398	**	3.91919	**	1.50536	n.s.	4.45474	**	2.26476	n.s.
	Values indicate means (n = 5). Symbols indicate significant differences from the control (MM) (Dunnett’s test). F values and significant levels are from one-way ANOVA. Significance levels: † P < 0.10, * P < 0.05, ** P < 0.01, *** P < 0.001; n.s. not significant.
[truncated: 10 more columns]

## Sheet: TableS7
	Table S7. Length of individual leaf sheaths across treatments in the plant growth regulator experiment.
	Treatment	Length (mm)
		LS1		LS2		LS3		LS4		LS5		LS6
	MM	351.4		272		235.6		249		273.6		245.6
	UM	353.4	n.s.	258.6	n.s.	237.4	n.s.	271.2	*	246.2	*	230	n.s.
	GM	369.2	n.s.	327.3	***	245.2	n.s.	253.2	n.s.	269.9	n.s.	231.4	n.s.
	MU	353.6	n.s.	273.6	n.s.	235.8	n.s.	248.4	n.s.	283.8	n.s.	253	n.s.
	MG	361.2	n.s.	276	n.s.	234.2	n.s.	253.6	n.s.	274.2	n.s.	236.4	n.s.
	UG	335.4	n.s.	263.6	n.s.	247.4	n.s.	267	n.s.	273.8	n.s.	241.6	n.s.
	GU	348.8	n.s.	317.6	***	266.4	*	243	n.s.	275.8	n.s.	249.4	n.s.
	F value	3.97561	**	20.201	***	2.59771	*	3.40865	*	4.14269	**	2.22175	*
	Values indicate means (n = 5). Symbols indicate significant differences from the control (MM) (Dunnett’s test). F values and significant levels are from one-way ANOVA. Significance levels: * P < 0.05, ** P < 0.01, *** P < 0.001; n.s. not significant.

## Sheet: TableS8
	Table S8. Length of individual leaf sheaths across cultivars in the 2022 field experiment.
	Cultivar	Length (mm)
		LS1		LS2		LS3		LS4		LS5+
	M23	374.75	bc	255.75	cd	246	cd	181.75	d	147.75	e
	TN	387	b	252	d	227.5	cd	196.25	d	170	de
	AH	356.75	cd	259.25	cd	258.75	bc	265	bc	221	bcd
	N11	370	bc	249.75	d	221.5	d	200	d	184.25	cde
	YA	341.75	d	289.25	b	283.25	b	260.25	bc	220.75	bcd
	MR	420.25	a	332.25	a	326.25	a	328.75	a	294.5	a
	TQ	362	bcd	262.5	cd	243.25	cd	243.75	c	223.75	bcd
	H193	355.75	cd	270.75	bcd	244.75	cd	255.5	bc	241.75	abc
	HA	362	bcd	292.25	b	288.75	b	285	b	263.25	ab
	KH	342.75	d	277.25	bc	280.5	b	286.75	b	306.75	a
	F value	17.3909	***	25.6154	***	22.8917	***	39.0497	***	14.4257	***
	Values indicate means (n = 4). Different letters within each column indicate significant differences among cultivars (Tukey’s HSD, P < 0.05). F values and significant levels are from one-way ANOVA. Significance levels: *** P < 0.001; n.s. not significant.
